# Supplementary material for: Galactosylated silver nanoparticles as a biocompatible intrinsic SERS probe for bladder cancer imaging and ex vivo tumor detection
Source: Royal Society of Chemistry journal article supplement (doi:10.1039/d5tb00546a), 2025-01-01
Supplement: d5tb00546a1.pdf [file d5tb00546a1.pdf]

## Supporting Information

# Galactosylated Silver Nanoparticles as a Biocompatible Intrinsic SERS Probe for Bladder Cancer Imaging and Ex Vivo Tumor Detection

Ting-Yu Cheng,<sup>a,†</sup> Yi-Chun Chiu,<sup>b-d,†</sup> Kuan-Hsu Chen,<sup>a,†</sup> Ya-Jyun Chen<sup>a</sup> and Chih-Chia Huang<sup>a,e,\*</sup>

<sup>a</sup>Department of Photonics, National Cheng Kung University, Tainan, 701, Taiwan

<sup>b</sup>Surgery, Taipei City Hospital Heping Fuyou Branch, Taipei, 100, Taiwan, R.O.C.

<sup>c</sup>Department of Urology, College of Medicine and Shu-Tien Urological Research Center, National Yang Ming Chiao Tung University, Taipei, 112, Taiwan, R.O.C.

<sup>d</sup>Department of Exercise and Health Sciences, University of Taipei, Taipei, 100, Taiwan, R.O.C.

<sup>e</sup>Center of Applied Nanomedicine, National Cheng Kung University, Tainan, 701, Taiwan, R.O.C.

**† These authors contributed equally.**

**\*Corresponding authors:**

Chih-Chia Huang, e-mail: [c2huang@mail.ncku.edu.tw](mailto:c2huang@mail.ncku.edu.tw); Address: No.1, University Road, Tainan City 701, Tainan 70457, Taiwan; Tel: +886-6-2757575 ext.63913

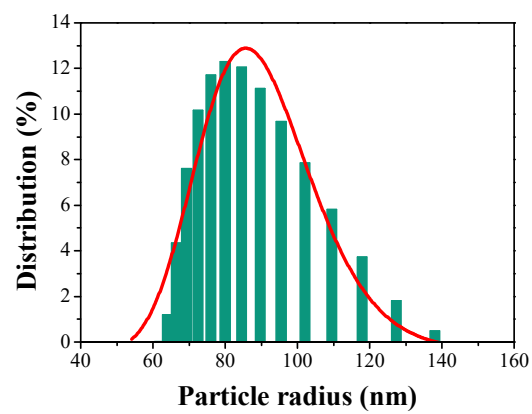

**Fig. S1** Particle size distribution of Ag@PGlyco-PSMA NPs by a DLS measurement.

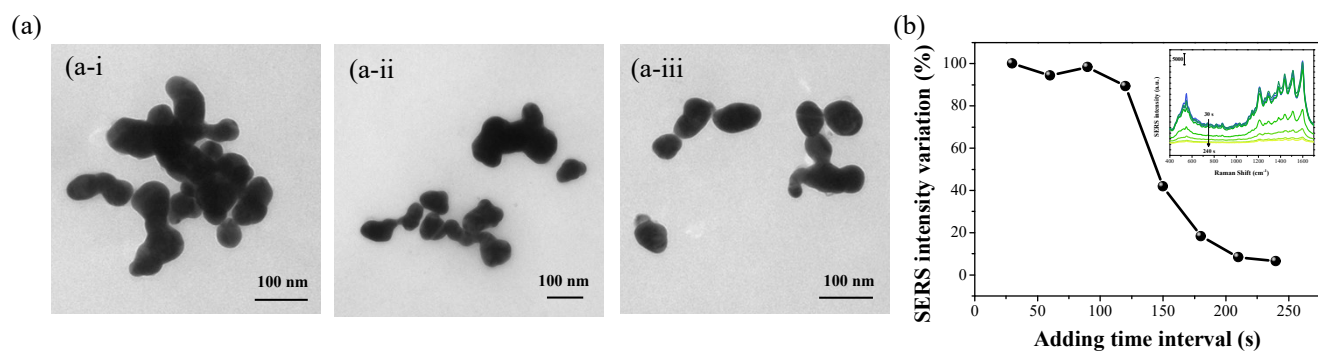

**Fig. S2** a) TEM image of Ag@PGlyco-PSMA synthesized by adding PSMA at different times of a-i) 90 s, a-ii) 150 s and a-iii) 210 s. (b) SERS intensity variation of Ag@PGlyco-PSMA synthesized by adding PSMA at 30, 60, 90, 120, 150, 180, 210, and 240 seconds. Inset in (b): SERS intensity record.

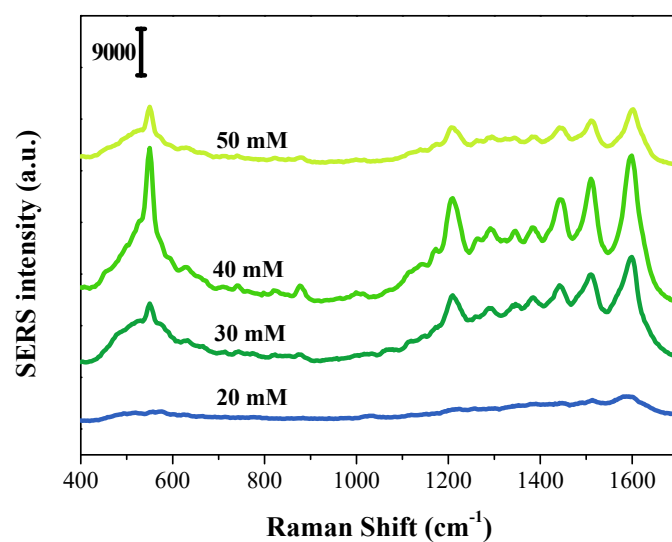

**Fig. S3** SERS spectrum of Ag@PGlyco-PSMA synthesized by different concentration (20-50 mM) of NaBH<sub>4</sub>.

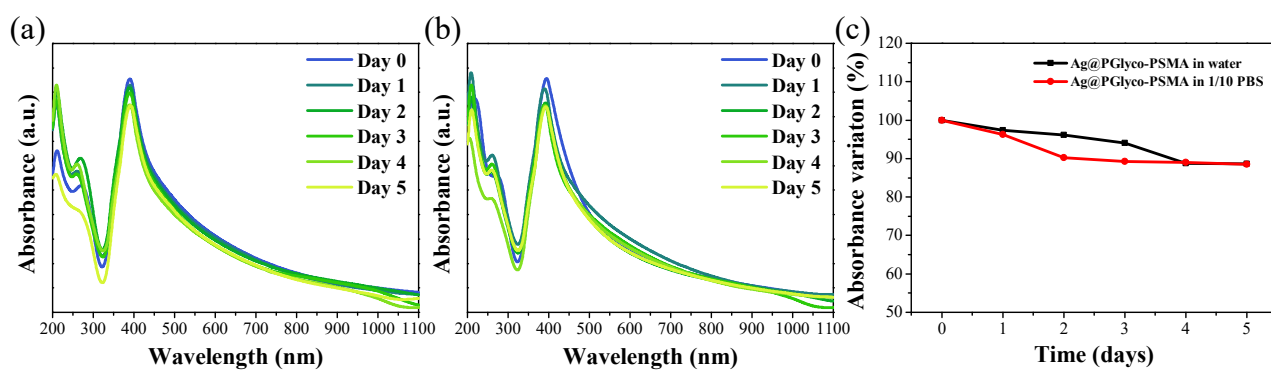

**Fig. S4** Absorption spectrum of Ag@PGlyco-PSMA NPs stored in a) D.I. water and b) 1/10 PBS for 5 days and c) corresponding absorbance variation record.

The analytical enhancement factor (AEF), as expressed in the equation, serves as a convenient method to compare the SERS amplification effect of enhanced substrates on analytes.

$$AEF = \frac{I_{SERS}/C_{SERS}}{I_{Raman}/C_{Raman}}$$

$I_{SERS}$  and  $I_{Raman}$  are the SERS intensity of analytes enhanced by substrates and the Raman intensity of analytes in solutions.  $C_{SERS}$  and  $C_{Raman}$  are concentrations of analyte in SERS and Raman measurement conditions.

To calculate the AEF of Ag@PGlyco-PSMA NPs, the 15 ppm<sub>[Ag]</sub> of Ag@PGlyco-PSMA NPs were mixed with  $8 \times 10^{-8}$  M ( $C_{SERS}$ ) MG for measurement. In this condition, the SERS signal was 520 ( $I_{SERS}$ ).

Then the  $8 \times 10^{-4}$  M ( $C_{Raman}$ ) MG was measured for normal Raman signal. In this condition, the Raman signal intensity of MG was 304 ( $I_{Raman}$ ).

The AEF value of Ag@PGlyco-PSMA NPs is calculated as  $1.71 \times 10^4$ .

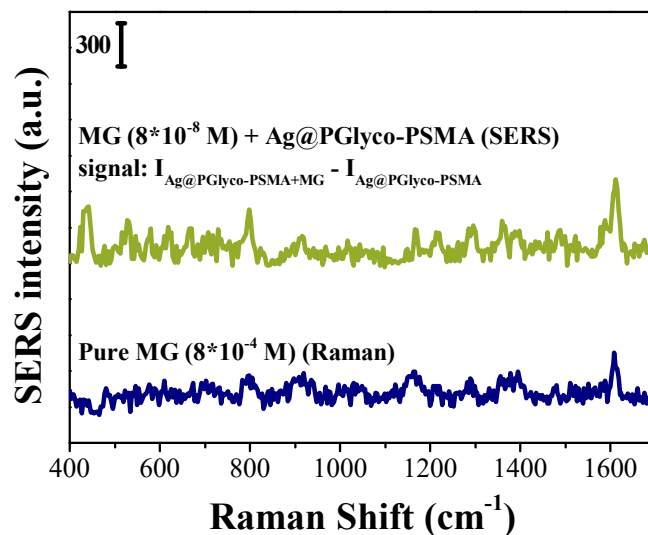

**Fig. S5** SERS and Raman spectra on MG molecules using portable 671 nm Raman system.

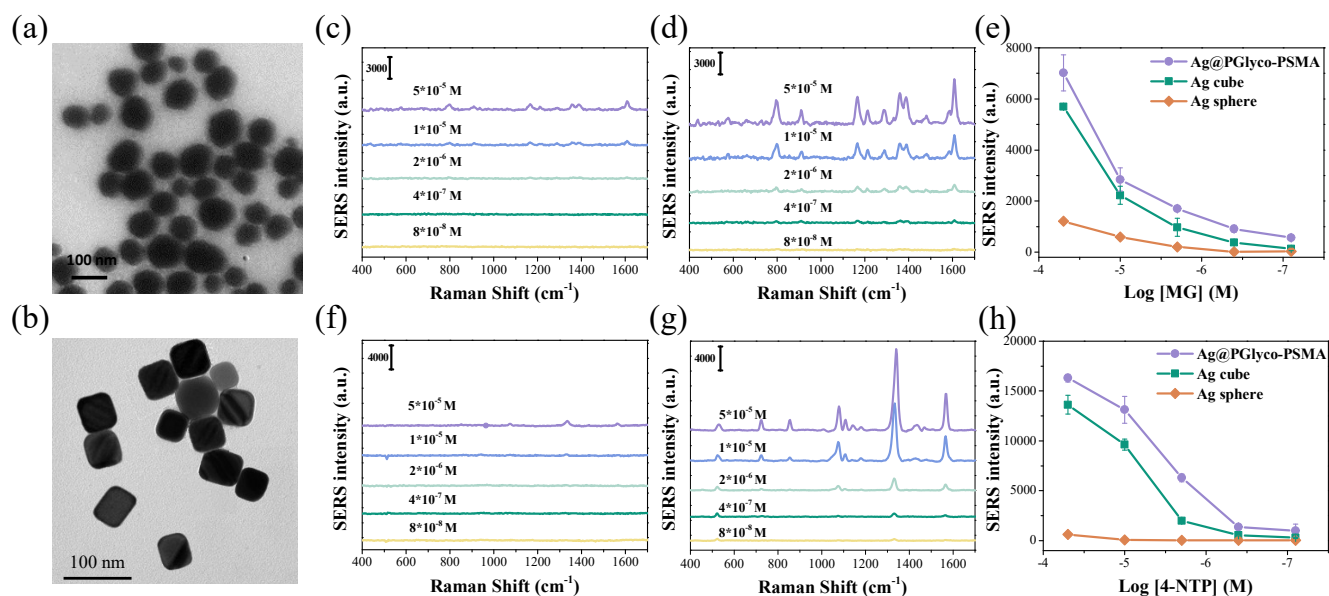

**Fig. S6** TEM images of a) Ag nanosphere and b) Ag nanocube. SERS spectra measurement of c) Ag nanosphere and d) Ag nanocube mixed with different concentration of MG and e) SERS intensity record at  $1608 \text{ cm}^{-1}$ . SERS spectra measurement of f) Ag nanosphere and g) Ag nanocube mixed with different concentration of 4-NTP for 1 hr and h) SERS intensity record at  $1339 \text{ cm}^{-1}$ .

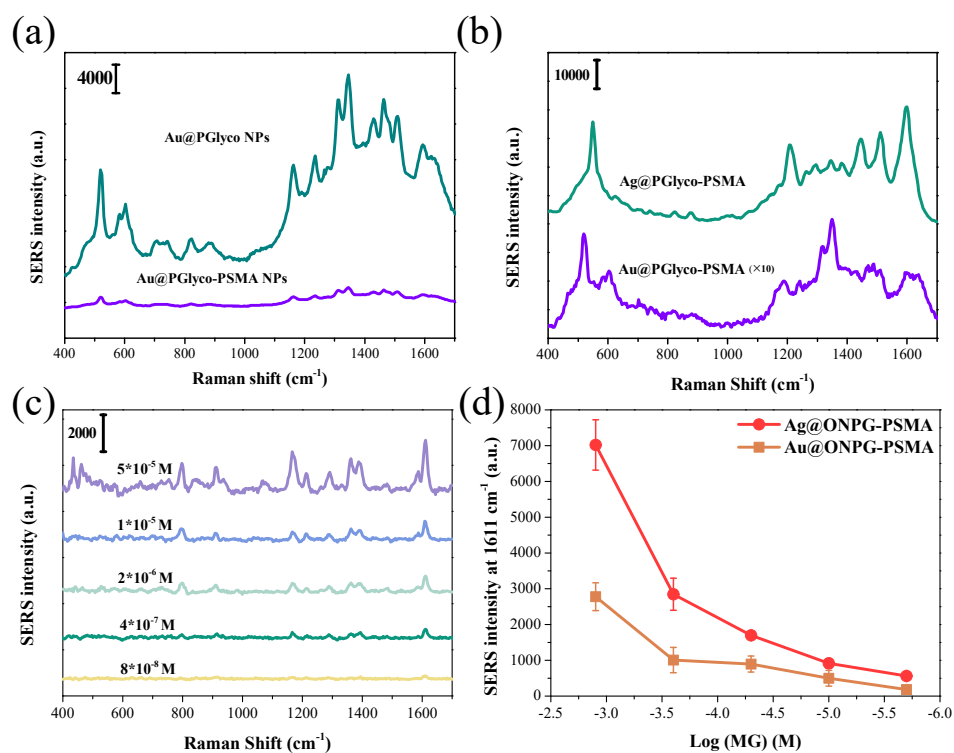

**Fig. S7** a) SERS spectrum of Au@PGlyco and Au@PGlyco-PSMA NPs. b) SERS spectrum of Ag@PGlyco-PSMA and Au@PGlyco-PSMA nanoparticles. The SERS spectra of Au@PGlyco-PSMA NPs is increased by a factor of 10. c) SERS spectrum measurement and d) SERS intensity record of Au@PGlyco-PSMA NPs mixed with different concentration of MG.



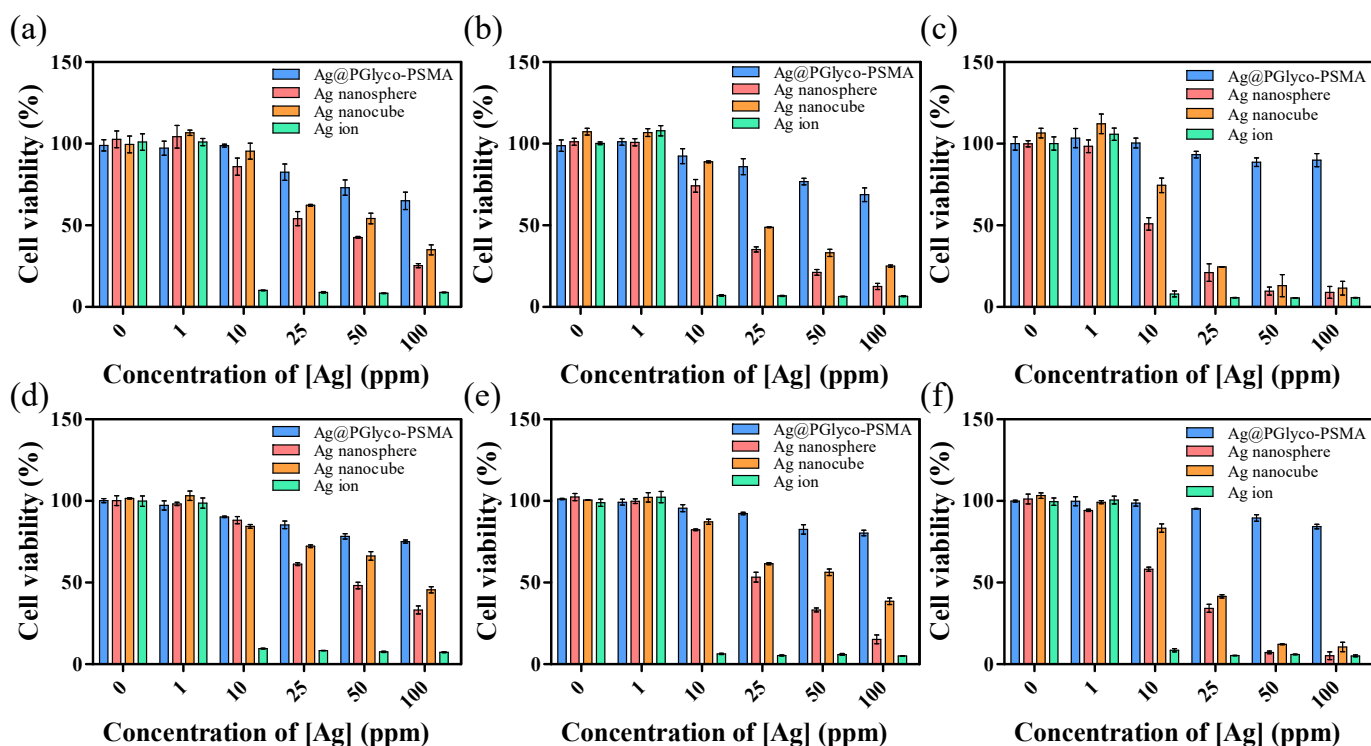

**Fig. S8** MTT assays of (a-c) T24 cells (n=4) and (d-f) SV-HUC-1 (n=4) cultured with Ag@PGlyco-PSMA NPs, Ag nanospheres, Ag nanocubes and Ag ions for a,d) 24 hours, b,e) 48 hours and c,f) 72 hours.

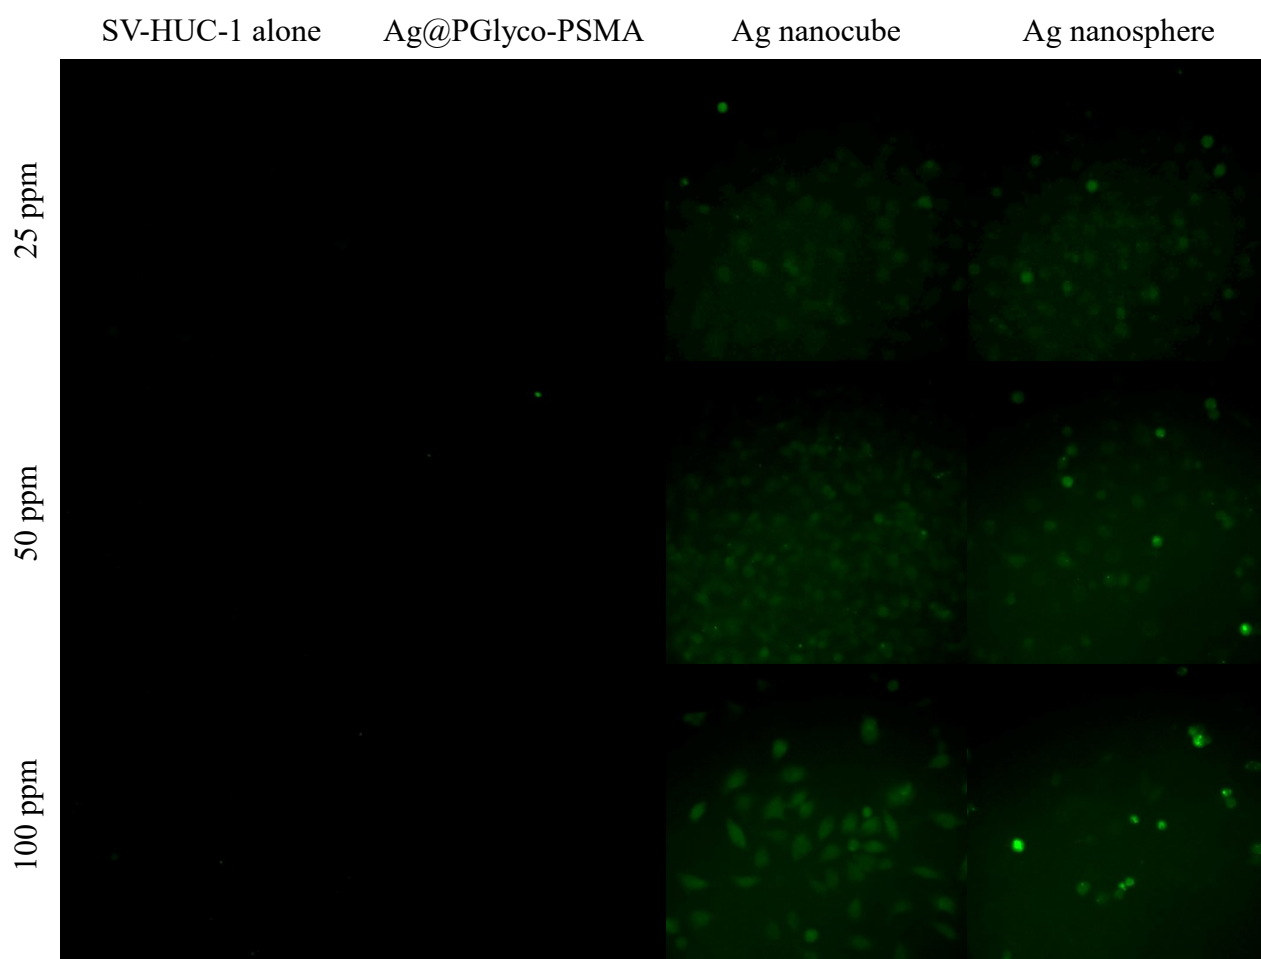

**Fig. S9** DCFH-DA staining of SV-HUC-1 cells cultured with 25, 50, and 100 ppm<sub>[Ag]</sub> Ag@PGlyco-PSMA NPs, Ag nanospheres, and Ag nanocubes for 24 hours.

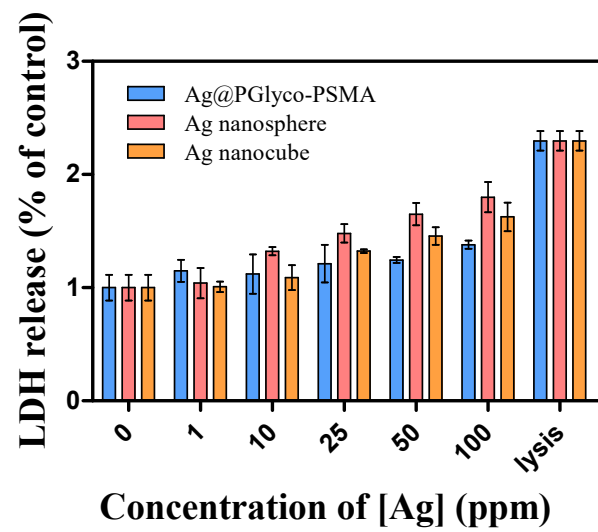

**Fig. S10** LDH assays of SV-HUC-1 cells cultured with Ag@PGlyco-PSMA NPs, Ag nanospheres and Ag nanocubes for 24 hours (n=4).

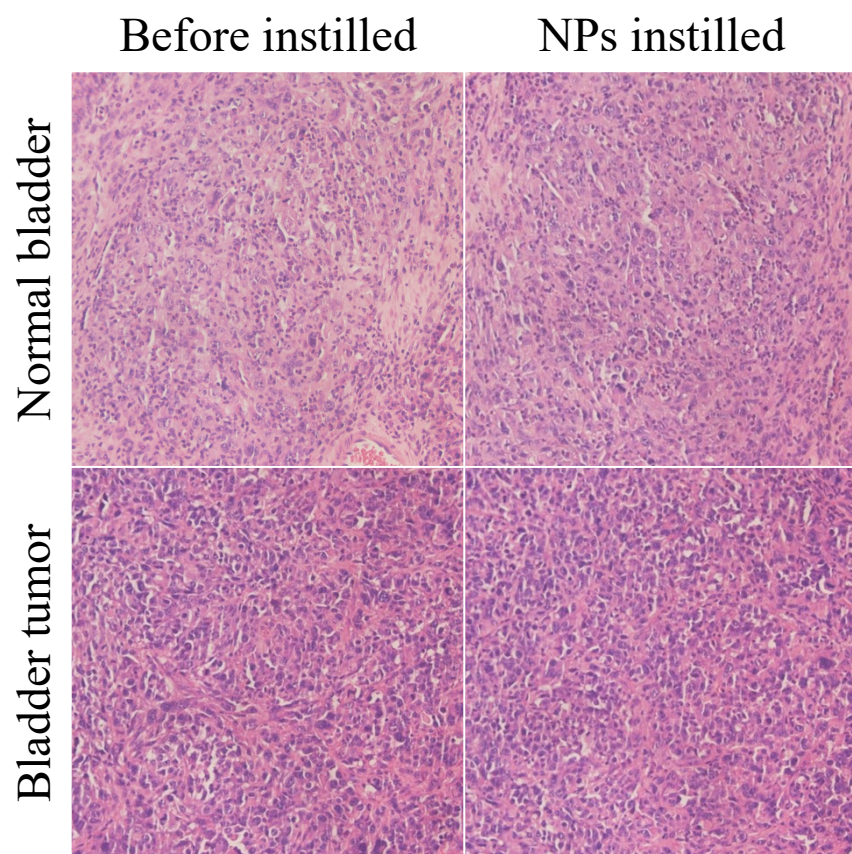

**Fig. S11** H&E staining of mice bladder with/without tumor instilled with 250 ppm<sub>[Ag]</sub> Ag@PGlyco-PSMA NPs.

**Table S1** SERS peak assignment of Ag@PGlyco-PSMA NPs

| Raman Shift (cm <sup>-1</sup> ) | Band assignment                                                          |
|---------------------------------|--------------------------------------------------------------------------|
| 876                             | C-C bending of quinoid ring                                              |
| 1145                            | C-H bending of Phenylhydrazine                                           |
| 1169                            | C-H bending of benzenoid and semiquinoid ring                            |
| 1209                            | C-N stretching of quinoid                                                |
| 1258                            | C-N stretching of reduced amine-benzenic ring                            |
| 1291                            | C-H bending of benzenoid                                                 |
| 1323                            | C~N+• stretching of semiquinone segments                                 |
| 1343                            | C~N+• stretching vibrations                                              |
| 1383                            | C~N stretching of semiquinonoid<br>(radical cations)                     |
| 1441                            | C-C stretching of benzene ring<br>(radical cations)                      |
| 1482                            | C=N stretching in quinoid segments                                       |
| 1510                            | N-H bending of protonated amine<br>(semiquinone radical cation)          |
| 1565                            | C-C stretching of quinoid ring                                           |
| 1596                            | C=C stretching of quinonoid ring<br>C~C stretching of semiquinonoid ring |
| 1620                            | C-C stretching of benzenoid ring<br>C=O stretching of benzoquinone       |

**Table S2** SERS peak assignment of malachite green (MG).

| <b>Raman Shift (cm<sup>-1</sup>)</b> | <b>Band assignment</b>                     |
|--------------------------------------|--------------------------------------------|
| 797                                  | C–H bending (out-of-plane) in phenyl rings |
| 911                                  | C–H bending (out-of-plane) in phenyl rings |
| 1170                                 | C–H bending (in-plane) in phenyl rings     |
| 1291                                 | C–H bending (in-plane) in phenyl rings     |
| 1362                                 | N–C stretching vibration                   |
| 1394                                 | C–C and C–H motions (in-plane)             |
| 1613                                 | C–C stretching in phenyl rings             |

**Table S3** SERS peak assignment of Rhodamine 6G (R6G).

| <b>Raman Shift (cm<sup>-1</sup>)</b> | <b>Band assignment</b>                       |
|--------------------------------------|----------------------------------------------|
| 613                                  | C–C bending (in-plane) in phenyl rings       |
| 772                                  | C–H bending (out-of-plane) in phenyl rings   |
| 1125                                 | C-H bending (in plane) xanthene/phenyl rings |
| 1182                                 | C–H bending (in-plane) in xanthene ring      |
| 1307                                 | C–O–C in-plane bending in xanthene ring      |
| 1359                                 | C–C stretching in xanthene ring              |
| 1507                                 | C–C stretching in xanthene ring              |
| 1568                                 | C–C stretching in phenyl ring                |
| 1648                                 | C–C stretching in xanthene ring              |

**Table S4** SERS peak assignment of 4-Nitrothiophenol.

| <b>Raman Shift (cm<sup>-1</sup>)</b> | <b>Band assignment</b>               |
|--------------------------------------|--------------------------------------|
| 1074                                 | C–H bending                          |
| 1105                                 | C–H bending                          |
| 1180                                 | C–H bending                          |
| 1330                                 | NO <sub>2</sub> symmetric stretching |
| 1565                                 | C–C stretching                       |
